# Supplementary material
Source: PubMed Central journal article supplement (PMC9896391)
Supplement: EIJ-D-21-00444_Liistro_SD.pdf [file EIJ-D-21-00444_Liistro_SD.pdf]

## Supplementary data

### Supplementary Appendix 1.

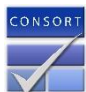

# CONSORT 2010 checklist of information to include when reporting a randomised trial\*

| Section/Topic             | Item No | Checklist item                                                                                                                        | Reported on page No                                                                         |
|---------------------------|---------|---------------------------------------------------------------------------------------------------------------------------------------|---------------------------------------------------------------------------------------------|
| <b>Title and abstract</b> |         |                                                                                                                                       |                                                                                             |
|                           | 1a      | Identification as a randomised trial in the title                                                                                     | Yes                                                                                         |
|                           | 1b      | Structured summary of trial design, methods, results, and conclusions (for specific guidance see CONSORT for abstracts)               | Yes                                                                                         |
| <b>Introduction</b>       |         |                                                                                                                                       |                                                                                             |
| Background and objectives | 2a      | Scientific background and explanation of rationale                                                                                    | 5                                                                                           |
|                           | 2b      | Specific objectives or hypotheses                                                                                                     | Not included                                                                                |
| <b>Methods</b>            |         |                                                                                                                                       |                                                                                             |
| Trial design              | 3a      | Description of trial design (such as parallel, factorial) including allocation ratio                                                  | 6                                                                                           |
|                           | 3b      | Important changes to methods after trial commencement (such as eligibility criteria), with reasons                                    | 6                                                                                           |
| Participants              | 4a      | Eligibility criteria for participants                                                                                                 | P. 6 and published study design article (Micari, et al. <i>J Crit Limb Ischemia</i> . 2021) |
|                           | 4b      | Settings and locations where the data were collected                                                                                  | Suppl Table 1, p. 2                                                                         |
| Interventions             | 5       | The interventions for each group with sufficient details to allow replication, including how and when they were actually administered | 7-8 and published study design article                                                      |
| Outcomes                  | 6a      | Completely defined pre-specified primary and secondary outcome measures, including how and when they were assessed                    | 8-9                                                                                         |
|                           | 6b      | Any changes to trial outcomes after the trial commenced, with reasons                                                                 | NA                                                                                          |
| Sample size               | 7a      | How sample size was determined                                                                                                        | Published study design article                                                              |
|                           | 7b      | When applicable, explanation of any interim analyses and stopping guidelines                                                          | Not included                                                                                |
| Randomisation:            |         |                                                                                                                                       |                                                                                             |

|                                                      |     |                                                                                                                                                                                             |                                |
|------------------------------------------------------|-----|---------------------------------------------------------------------------------------------------------------------------------------------------------------------------------------------|--------------------------------|
| Sequence generation                                  | 8a  | Method used to generate the random allocation sequence                                                                                                                                      | Not included                   |
|                                                      | 8b  | Type of randomisation; details of any restriction (such as blocking and block size)                                                                                                         | Published study design article |
| Allocation concealment mechanism                     | 9   | Mechanism used to implement the random allocation sequence (such as sequentially numbered containers), describing any steps taken to conceal the sequence until interventions were assigned | Not included                   |
| Implementation                                       | 10  | Who generated the random allocation sequence, who enrolled participants, and who assigned participants to interventions                                                                     | Published study design article |
| Blinding                                             | 11a | If done, who was blinded after assignment to interventions (for example, participants, care providers, those assessing outcomes) and how                                                    | 16-17                          |
|                                                      | 11b | If relevant, description of the similarity of interventions                                                                                                                                 | NA                             |
| Statistical methods                                  | 12a | Statistical methods used to compare groups for primary and secondary outcomes                                                                                                               | 10                             |
|                                                      | 12b | Methods for additional analyses, such as subgroup analyses and adjusted analyses                                                                                                            | 10                             |
| <b>Results</b>                                       |     |                                                                                                                                                                                             |                                |
| Participant flow (a diagram is strongly recommended) | 13a | For each group, the numbers of participants who were randomly assigned, received intended treatment, and were analysed for the primary outcome                                              | P. 6, Figure 1, Tables 1 and 2 |
|                                                      | 13b | For each group, losses and exclusions after randomisation, together with reasons                                                                                                            | Figure 1                       |
| Recruitment                                          | 14a | Dates defining the periods of recruitment and follow-up                                                                                                                                     | Not included                   |
|                                                      | 14b | Why the trial ended or was stopped                                                                                                                                                          | NA                             |
| Baseline data                                        | 15  | A table showing baseline demographic and clinical characteristics for each group                                                                                                            | Table 1                        |
| Numbers analysed                                     | 16  | For each group, number of participants (denominator) included in each analysis and whether the analysis was by original assigned groups                                                     | Table 2 and Table 3            |
| Outcomes and estimation                              | 17a | For each primary and secondary outcome, results for each group, and the estimated effect size and its precision (such as 95% confidence interval)                                           | Pp. 11-13, Tables 2 and 3      |
|                                                      | 17b | For binary outcomes, presentation of both absolute and relative effect sizes is recommended                                                                                                 | NA                             |
| Ancillary analyses                                   | 18  | Results of any other analyses performed, including subgroup analyses and adjusted analyses, distinguishing pre-specified from exploratory                                                   | NA, all pre-specified          |
| Harms                                                | 19  | All important harms or unintended effects in each group (for specific guidance see CONSORT for harms)                                                                                       | None reported                  |
| <b>Discussion</b>                                    |     |                                                                                                                                                                                             |                                |
| Limitations                                          | 20  | Trial limitations, addressing sources of potential bias, imprecision, and, if relevant, multiplicity of analyses                                                                            | 16-17                          |
| Generalisability                                     | 21  | Generalisability (external validity, applicability) of the trial findings                                                                                                                   | Not included                   |

|                          |    |                                                                                                               |                 |
|--------------------------|----|---------------------------------------------------------------------------------------------------------------|-----------------|
| Interpretation           | 22 | Interpretation consistent with results, balancing benefits and harms, and considering other relevant evidence | 17-18           |
| <b>Other information</b> |    |                                                                                                               |                 |
| Registration             | 23 | Registration number and name of trial registry                                                                | Abstract (p. 2) |
| Protocol                 | 24 | Where the full trial protocol can be accessed, if available                                                   | Not included    |
| Funding                  | 25 | Sources of funding and other support (such as supply of drugs), role of funders                               | 18              |

\*We strongly recommend reading this statement in conjunction with the CONSORT 2010 Explanation and Elaboration for important clarifications on all the items. If relevant, we also recommend reading CONSORT extensions for cluster randomised trials, non-inferiority and equivalence trials, non-pharmacological treatments, herbal interventions, and pragmatic trials. Additional extensions are forthcoming: for those and for up to date references relevant to this checklist, see [www.consort-statement.org](http://www.consort-statement.org).

**Supplementary Table 1. IN.PACT BTK randomised study sites and investigators.**

| <b>Study site</b>                                            | <b>Location</b>           | <b>Investigators</b>                                                 |
|--------------------------------------------------------------|---------------------------|----------------------------------------------------------------------|
| <b>Universitair Ziekenhuis Gent</b>                          | Gent, Belgium             | Frank Vermassen, MD, PhD                                             |
| <b>UniversitätsSpital Zürich</b>                             | Zurich, Switzerland       | Martin Banyai, MD<br>Frederic Baumann, MD<br>Robert Kreuzpointer, MD |
| <b>Ziekenhuis Oost Limburg –<br/>Campus Sint-Jan</b>         | Genk, Belgium             | Wouter Lansink, MD                                                   |
| <b>Hôpital Guillaume et René<br/>Laënnec – CHU de Nantes</b> | Nantes, France            | Yann Gouëffic, MD, PhD<br>Philippe Chaillou, MD                      |
| <b>IRCCS Multimedica</b>                                     | Sesto San Giovanni, Italy | Flavio Airoidi, MD                                                   |
| <b>University General Hospital of<br/>Patras</b>             | Patras, Greece            | Konstantinos Katsanos, MD,<br>PhD                                    |
| <b>AZ Sint-Blasius – Campus<br/>Dendermonde</b>              | Dendermonde, Belgium      | Koen Deloose, MD                                                     |
| <b>Maria Cecilia Hospital</b>                                | Cotignola, Italy          | Antonio Micari, MD, PhD<br>Paolo Sbarzaglia, MD                      |
| <b>Ospedale San Donato</b>                                   | Arezzo, Italy             | Francesco Liistro, MD                                                |

**Supplementary Table 2. Procedural characteristics and outcomes from the IN.PACT BTK randomised study.**

|                                                                     | <b>DCB<br/>(N=23<br/>participants)<br/>(N=25 lesions*)</b> | <b>PTA<br/>(N=27<br/>participants)<br/>(N=30 lesions*)</b> | <b>p-value</b> |
|---------------------------------------------------------------------|------------------------------------------------------------|------------------------------------------------------------|----------------|
| <b>Inflow lesion treatment during index procedure<sup>†,§</sup></b> | 43.5 (10/23)                                               | 51.9 (14/27)                                               | 0.584          |
| <b>Predilation<sup>†</sup></b>                                      | 100.0 (25/25)                                              | 100.0 (30/30)                                              | >0.999         |
| <b>Number of predilations per lesion<sup>†</sup></b>                |                                                            |                                                            | 0.087          |
| <b>1</b>                                                            | 16.0 (4/25)                                                | 6.7 (2/30)                                                 |                |
| <b>2</b>                                                            | 36.0 (9/25)                                                | 20.0 (6/30)                                                |                |
| <b>3</b>                                                            | 32.0 (8/25)                                                | 26.7 (8/30)                                                |                |
| <b>&gt;3</b>                                                        | 16.0 (4/25)                                                | 46.7 (14/30)                                               |                |
| <b>Maximum predilation pressure per lesion, atm<sup>†</sup></b>     | 12.3±2.9 (25)                                              | 13.2±2.5 (30)                                              | 0.295          |
| <b>Number of DCB balloons per participant<sup>†</sup></b>           |                                                            |                                                            | –              |
| <b>1</b>                                                            | 0.0 (0/23)                                                 | NA                                                         |                |
| <b>2</b>                                                            | 26.1 (6/23)                                                | NA                                                         |                |
| <b>3</b>                                                            | 56.5 (13/23)                                               | NA                                                         |                |
| <b>&gt;3</b>                                                        | 17.4 (4/23)                                                | NA                                                         |                |
| <b>Maximum DCB pressure per balloon, atm<sup>†</sup></b>            | 12.6±2.4 (68)                                              | NA                                                         | –              |
| <b>DCB balloon diameter, mm<sup>†</sup></b>                         | 3.1±0.4 (25)                                               | NA                                                         | –              |
| <b>Post-dilation<sup>†</sup></b>                                    | 36.0 (9/25)                                                | 10.0 (3/30)                                                | 0.026          |
| <b>Overall balloon diameter (all balloons used), mm<sup>†</sup></b> | 3.0±0.3 (25)                                               | 2.9±0.4 (30)                                               | 0.187          |
| <b>Provisional stent<sup>†</sup></b>                                | 8.0 (2/25)                                                 | 3.3 (1/30)                                                 | 0.586          |
| <b>Dissections<sup>‡</sup></b>                                      |                                                            |                                                            | 0.108          |
| <b>0</b>                                                            | 45.8 (11/24)                                               | 72.4 (21/29)                                               |                |
| <b>A</b>                                                            | 0.0 (0/24)                                                 | 0.0 (0/29)                                                 |                |
| <b>B</b>                                                            | 45.8 (11/24)                                               | 24.1 (7/29)                                                |                |
| <b>C</b>                                                            | 4.2 (1/24)                                                 | 3.4 (1/29)                                                 |                |
| <b>D</b>                                                            | 4.2 (1/24)                                                 | 0.0 (0/29)                                                 |                |
| <b>E–F</b>                                                          | 0.0 (0/24)                                                 | 0.0 (0/29)                                                 |                |
| <b>MLD, mm<sup>‡</sup></b>                                          | 1.945±0.412 (24)                                           | 1.797±0.462 (29)                                           | 0.230          |
| <b>Diameter stenosis, %<sup>‡</sup></b>                             | 31.843±10.959 (24)                                         | 34.124±14.368 (29)                                         | 0.703          |
| <b>Final residual stenosis, %<sup>†</sup></b>                       | 5.1±7.6 (25)                                               | 6.8±8.5 (30)                                               | 0.432          |
| <b>Device success<sup>†,¶</sup></b>                                 | 94.1 (64/68)                                               | NA                                                         | –              |
| <b>Clinical success<sup>‡,#</sup></b>                               | 52.2 (12/23)                                               | 40.7 (11/27)                                               | 0.570          |

Values are mean±SD (N) or % (n/N).

\* The study sites and core laboratory identified different numbers of target lesions in each treatment group. Study sites identified 25 target lesions in the DCB group and 30 in the PTA group. Therefore, all site-reported lesion characteristics use 25 as the denominator for the DCB group and 30 as the denominator for the PTA group. The core laboratory identified 24 target

lesions in the DCB group and 29 in the PTA group. Therefore, all core laboratory-reported lesion characteristics use 24 as the denominator for the DCB group and 29 as the denominator for the PTA group.

† Site reported.

‡ Core laboratory reported.

§ Significant inflow lesions in the ipsilateral iliac, superficial femoral artery and popliteal arteries needed to be treated successfully prior to enrolment in the study. No other non-target lesions (including outflow lesions) in the target limb were allowed to be treated.

¶ Device success is defined as successful drug delivery, balloon inflation, deflation and retrieval of the intact study device without burst below the rated burst pressure (balloon-based assessment, DCB group only).

# Clinical success is defined as residual stenosis  $\leq 30\%$  without procedural complication (death, major target limb amputation, thrombosis of target lesion, or target vessel revascularisation) prior to discharge (participant-based assessment).

DCB: drug-coated balloon; MLD: minimal lumen diameter; PTA: percutaneous transluminal angioplasty

**Supplementary Table 3. Functional flow assessment by duplex ultrasound up to nine months from the IN.PACT BTK randomised study.**

|                                                                | <b>DCB</b><br>(N=24 lesions*) | <b>PTA</b><br>(N=29 lesions*) | <b>Difference [95% CI]</b> | <b>p-value</b> |
|----------------------------------------------------------------|-------------------------------|-------------------------------|----------------------------|----------------|
| <b>Lesions with functional flow at 3 months, %<sup>†</sup></b> | 93.8 (15/16)                  | 66.7 (14/21)                  | 27.1 [-0.3, 49.0]          | 0.104          |
| <b>Lesions with functional flow at 6 months, %<sup>†</sup></b> | 88.2 (15/17)                  | 72.2 (13/18)                  | 16.0 [-11.2, 40.6]         | 0.402          |
| <b>Lesions with functional flow at 9 months, %<sup>†</sup></b> | 84.6 (11/13)                  | 60.0 (6/10)                   | 24.6 [-10.9, 55.4]         | 0.341          |

Values are % (n/N) unless otherwise indicated.

\* Core laboratory analysis determined a total of 24 target lesions in the DCB group and 29 target lesions in the PTA group. All core laboratory-based assessments use these values for counts and proportions.

<sup>†</sup> Functional flow defined as the absence of target lesion occlusion (no flow) as assessed by duplex ultrasound.

CI: confidence interval; DCB: drug-coated balloon; PTA: percutaneous transluminal angioplasty

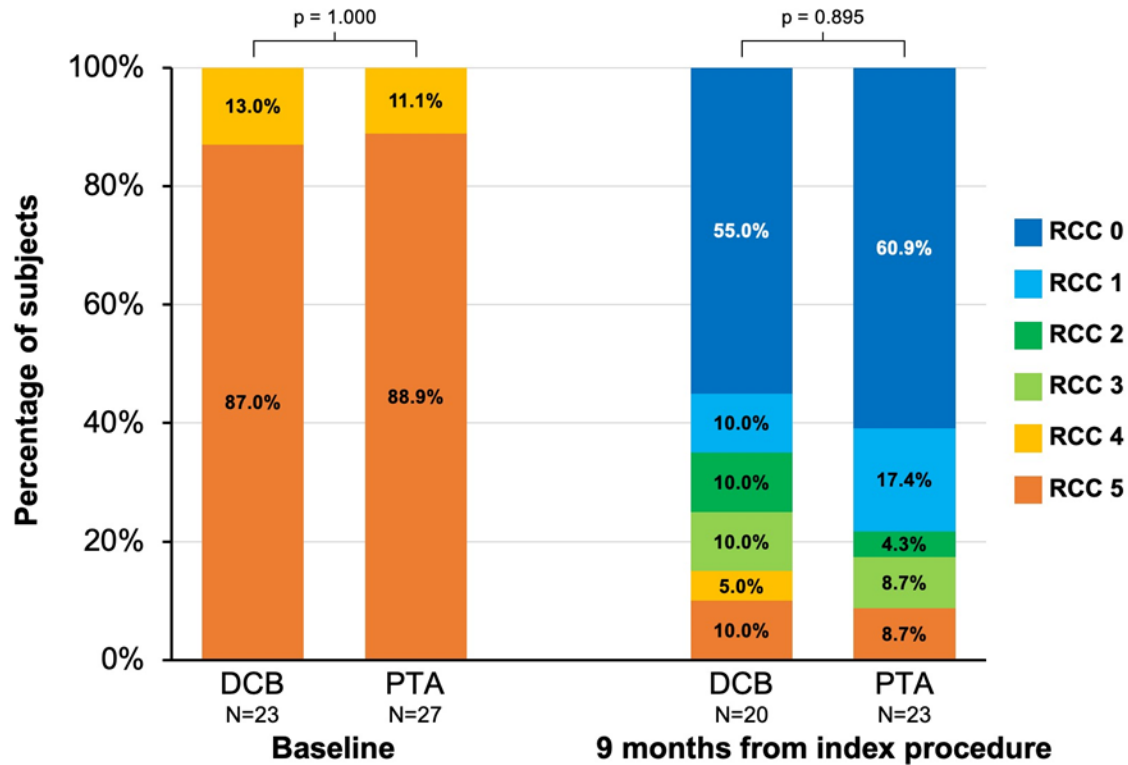

**Supplementary Figure 1.** Rutherford clinical category at baseline and month 9 in the IN.PACT BTK randomised study.

Participants in both groups showed clinical improvement in RCC from baseline to nine months after the index procedure. The distribution of participants among RCC categories was not significantly different between groups at baseline ( $p=1.000$ ) or nine months ( $p=0.895$ ).

DCB: drug-coated balloon; PTA: percutaneous transluminal angioplasty; RCC: Rutherford clinical category
